# Supplementary material for: Thermo-responsive organic–inorganic hybrid vesicles with tunable membrane permeability
Source: Royal Society of Chemistry journal article supplement (doi:10.1039/c2sm26638e), 2012-01-01
Supplement: c2sm26638e.pdf [file c2sm26638e.pdf]

## **Electronic Supplementary Information**

### **Thermo-responsive organic/inorganic hybrid vesicles with tunable membrane permeability**

Bo Peng, Yu Liu, Yi Shi, Zhibo Li, and Yongming Chen\*

Laboratory of Polymer Physics and Chemistry, Institute of Chemistry,

The Chinese Academy of Sciences, Beijing 100190, China.

E-mail: [ymchen@iccas.ac.cn](mailto:ymchen@iccas.ac.cn).

Fax: +0086-10-62559373; Tel: +0086-10-62659906

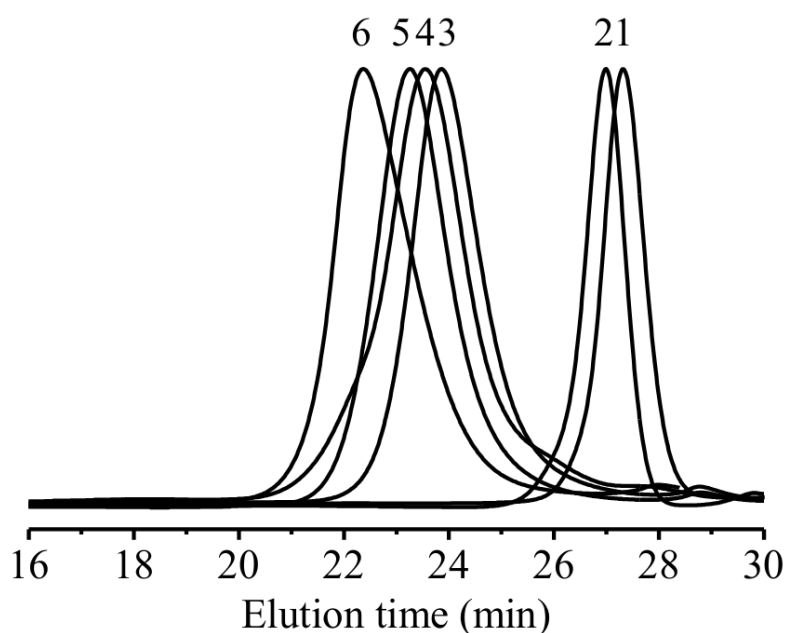

**Figure S1.** SEC traces of (1) PEO<sub>45</sub>; (2) PEO<sub>45</sub>-EDMAT; (3) PEO<sub>45</sub>-*b*-P(NIPAM<sub>66</sub>-*r*-TMPM<sub>9</sub>); (4) PEO<sub>45</sub>-*b*-P(NIPAM<sub>75</sub>-*r*-TMPM<sub>12</sub>); (5) PEO<sub>45</sub>-*b*-P(NIPAM<sub>69</sub>-*r*-TMPM<sub>17</sub>); (6) PEO<sub>45</sub>-*b*-P(NIPAM<sub>63</sub>-*r*-TMPM<sub>28</sub>).

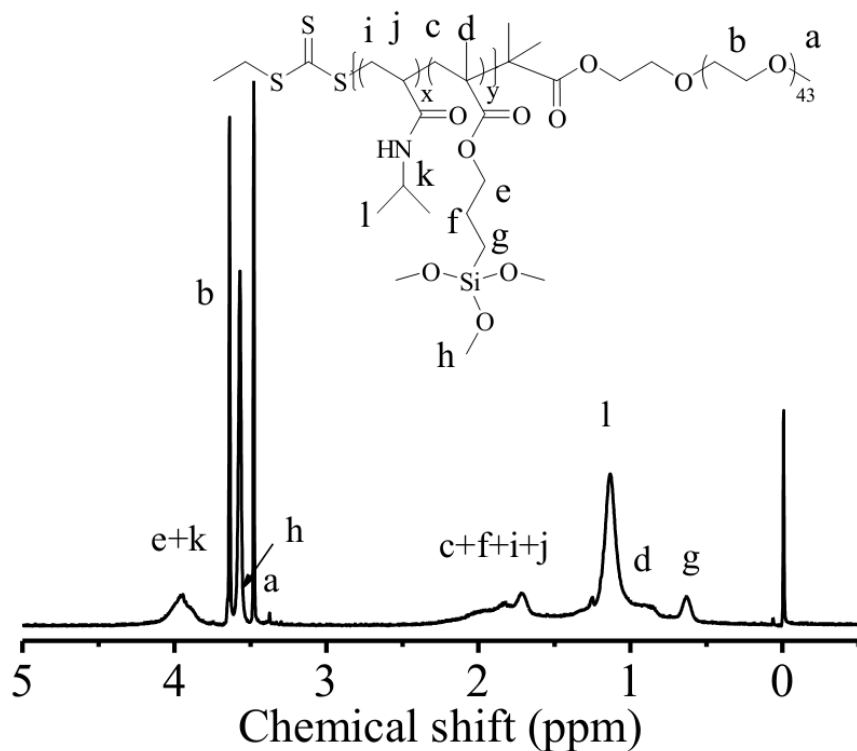

**Figure S2.** <sup>1</sup>H NMR spectrum of PEO<sub>45</sub>-*b*-P(NIPAM<sub>63</sub>-*r*-TMPM<sub>28</sub>) copolymer in CDCl<sub>3</sub>.

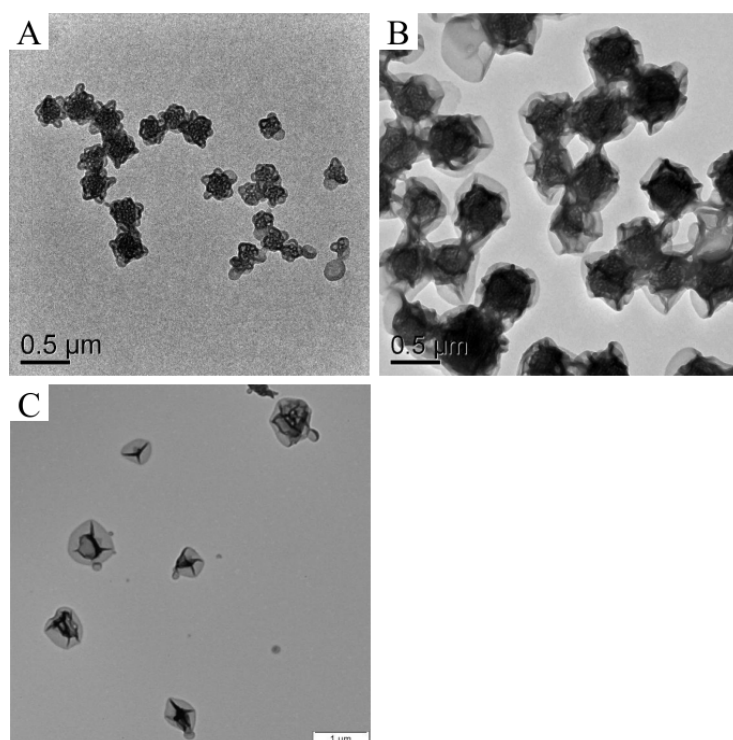

**Figure S3.** TEM images of gelated aggregates prepared from  $\text{PEO}_{45}\text{-}b\text{-P}(\text{NIPAM}_{69}\text{-}r\text{-TTPM}_{17})$  at 50 wt %  $\text{H}_2\text{O}$ , (A)  $C_{\text{ini}} = 2 \text{ mg/mL}$ ; (B)  $C_{\text{ini}} = 5 \text{ mg/mL}$ ; (C)  $C_{\text{ini}} = 20 \text{ mg/mL}$ , at  $28^\circ\text{C}$ .

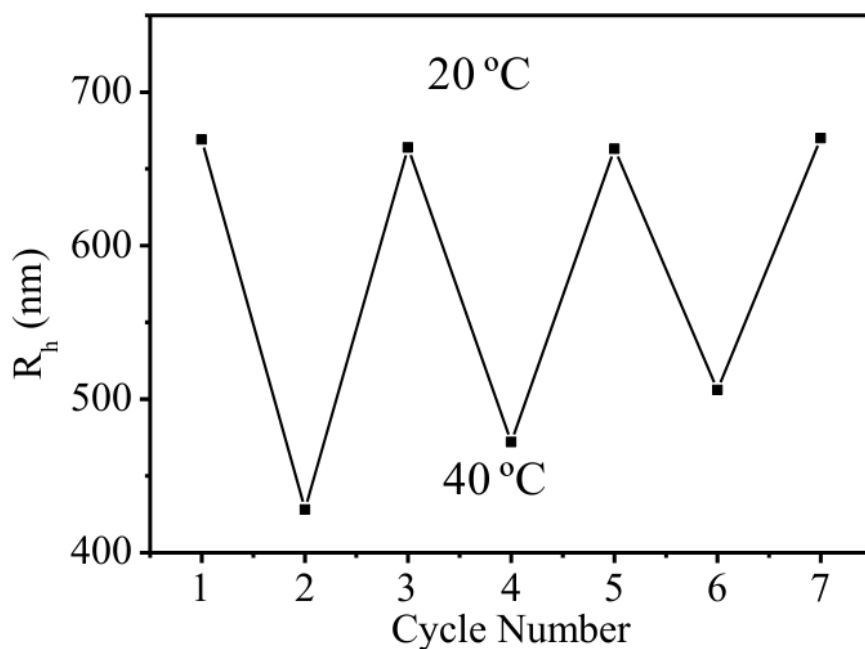

**Figure S4.** Reversible size change of the gelated porous vesicles generated from  $\text{PEO}_{45}\text{-}b\text{-P}(\text{NIPAM}_{66}\text{-}r\text{-TTPM}_9)$  shown in Figure 3A at  $20^\circ\text{C}$  and  $40^\circ\text{C}$ .
